# Supplementary material for: A new computational strategy to calculate the edge energy of a relaxed step. Calcite (CaCO3) as a case study
Source: Royal Society of Chemistry journal article supplement (doi:10.1039/d1ce01119g), 2021-01-01
Supplement: d1ce01119g1.pdf [file d1ce01119g1.pdf]

## Electronic Supplementary Information

### A new computational strategy to calculate the edge energy of a relaxed step. Calcite ( $\text{CaCO}_3$ ) as a case study

Bruno M.,<sup>1,2,3\*</sup> Aquilano D.<sup>1</sup>

<sup>1</sup> Dipartimento di Scienze della Terra, Università degli Studi di Torino, Via Valperga Caluso 35, Torino, 10125-Italy

<sup>2</sup> SpectraLab s.r.l., Spin-off accademico dell'Università degli Studi di Torino, Via G. Quarello 15/a, 10135, Torino (TO), Italy

<sup>3</sup> NIS, Centre for Nanostructured Interfaces and Surfaces, Università degli Studi di Torino, Via G. Quarello 15/a, 10135, Torino (TO), Italy

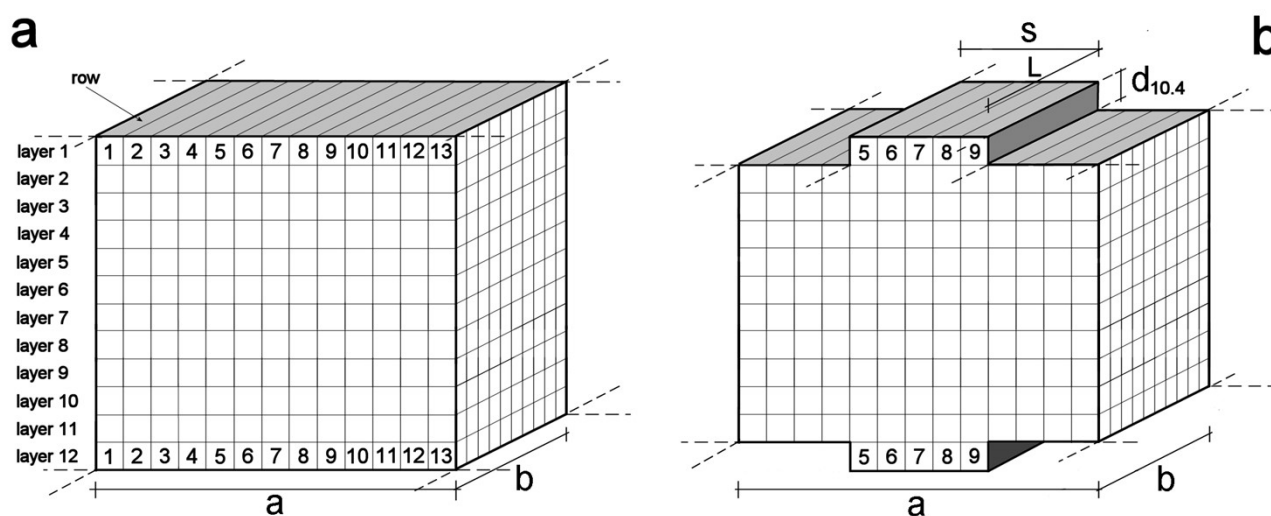

**Figure S1.** Kossel's crystal is used to exemplify the construction of two steps of height  $d_{10.4}$  on the top and bottom crystal surface of a slab of calcite for performing quantum-mechanical geometry optimizations. (a) Twelve-layers (10.4) slab is cut from the optimized bulk structure of calcite. (b) Steps delimited by two  $[uvw]$  edges parallel to cell parameter  $b$  are generated by deleting rows 1-4 and 10-13 in the layers 1 and 12.  $S$  and  $L$  are the width and length of the step, respectively. Top and bottom surfaces of the slab (with step) are be put in relation by either an inversion center or a mirror plane to cancel out the dipole moment and allowing quantum-mechanical calculations.

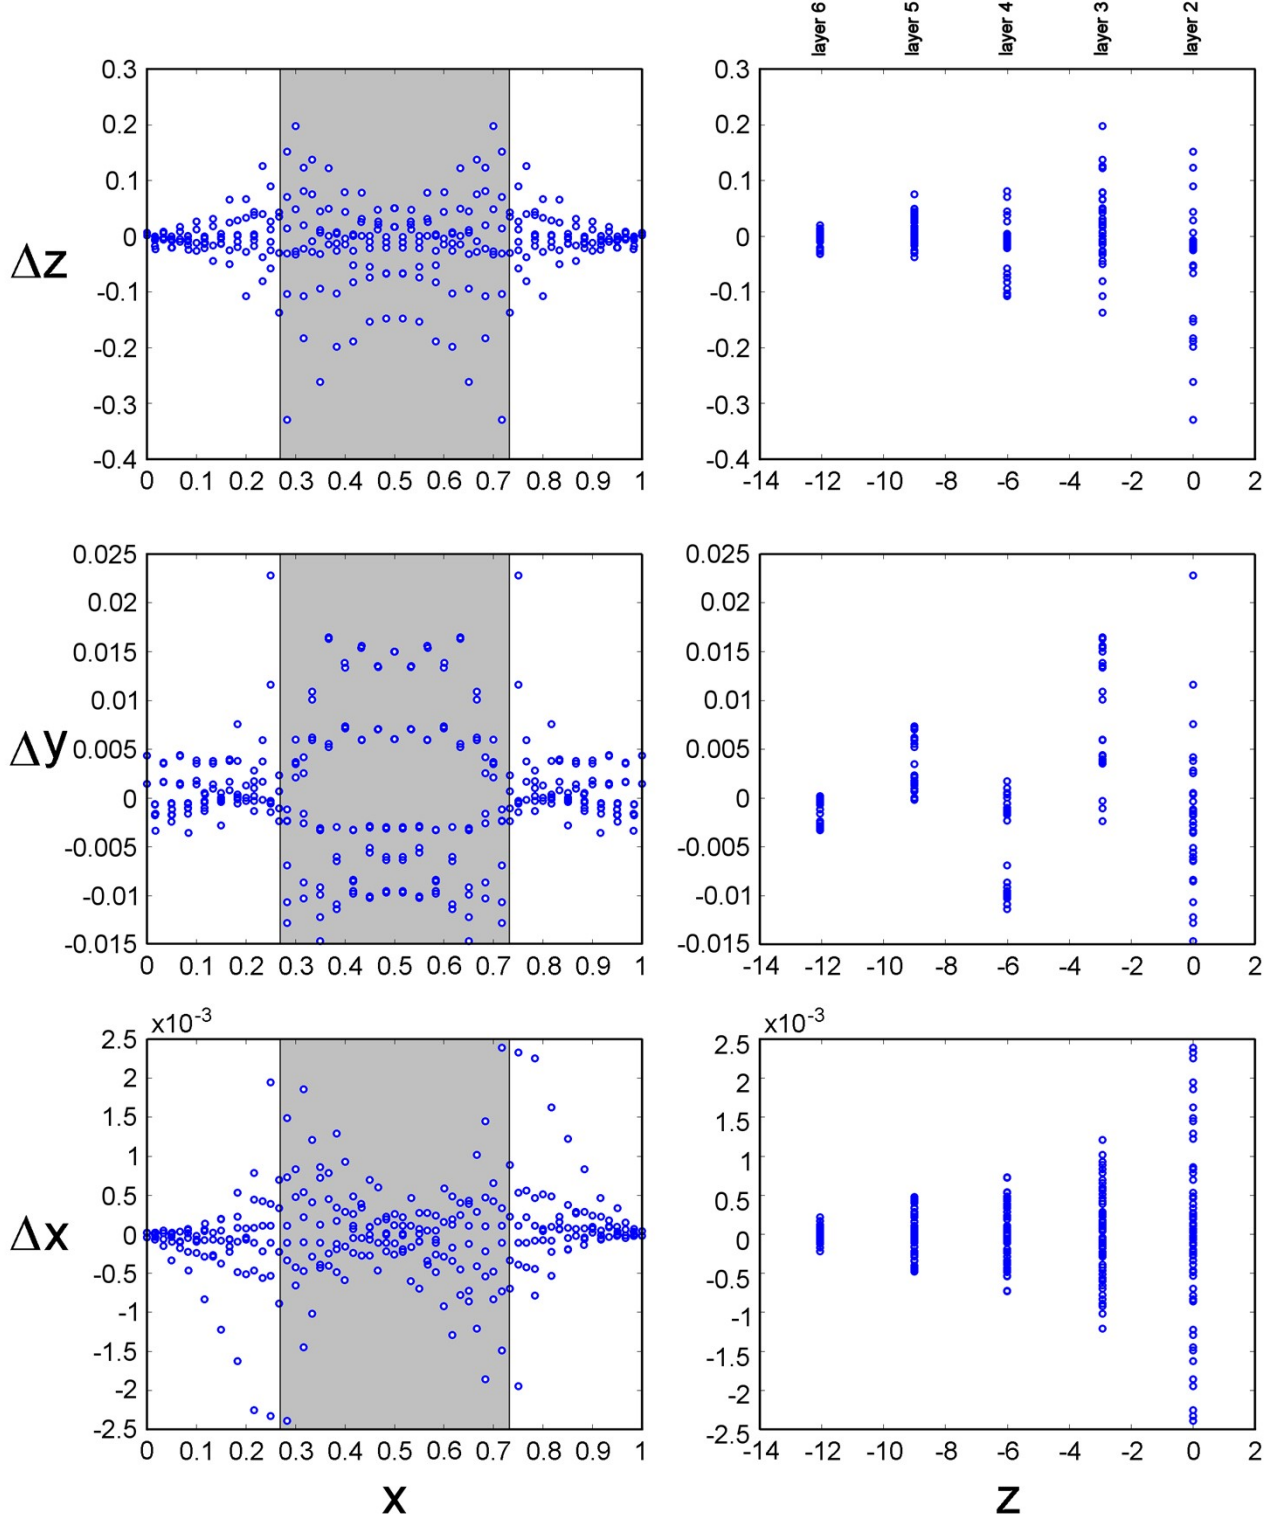

**Figure S2.**  $\Delta X$ ,  $\Delta Y$  and  $\Delta Z$  as a function of  $X$  (fractional coordinates) and  $Z$  (cartesian coordinates, Å) for the  $[4\bar{2}1]_{Ca}$  step on (10.4) surface. In the left column, the grey area indicates the location of the step along  $X$ . In the right column,  $Z = 0$  is the  $d_{10.4}$  layer just below the step (i.e., layer 2) and  $Z \sim -12$  Å is the last layer in region 1 (i.e., layer 6).

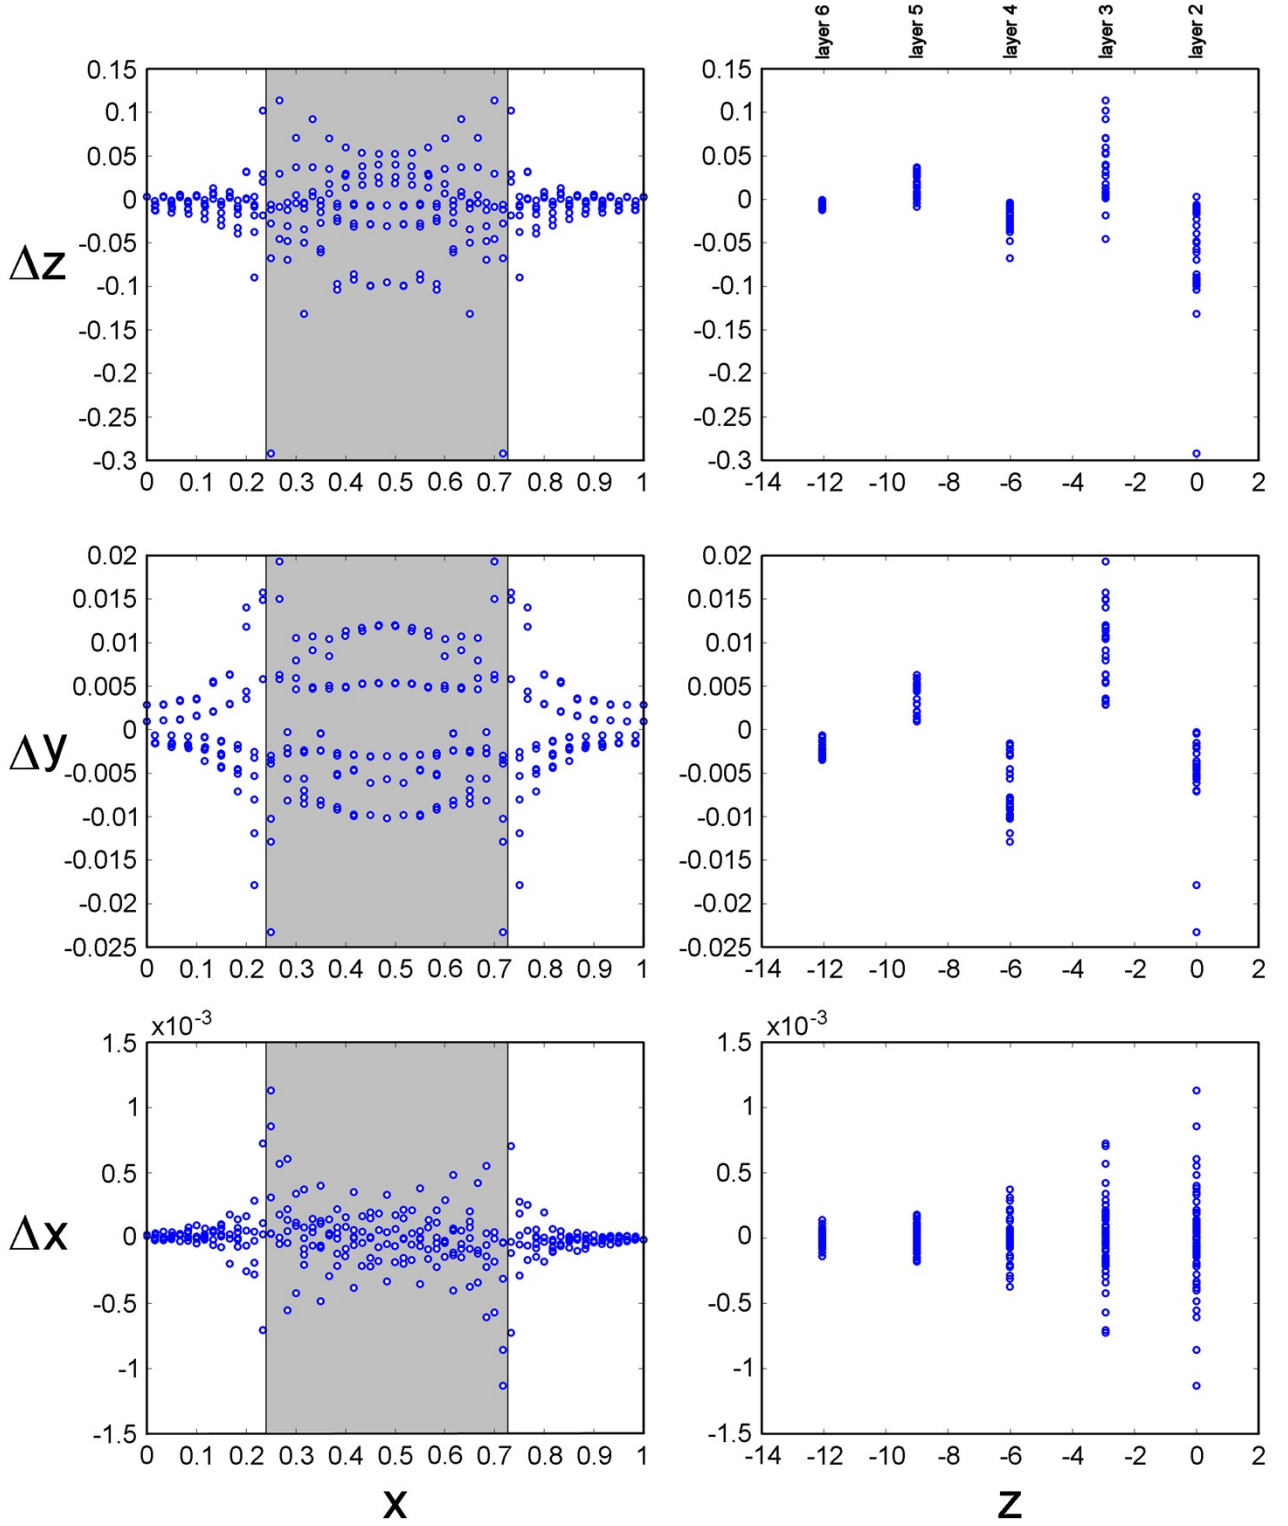

**Figure S3.**  $\Delta X$ ,  $\Delta Y$  and  $\Delta Z$  as a function of X (fractional coordinates) and Z (cartesian coordinates, Å) for the  $[4\bar{2}1]_{\text{CO}_3(\text{A})}$  step on (10.4) surface. In the left column, the grey area indicates the location of the step along X. In the right column, Z = 0 is the  $d_{10.4}$  layer just below the step (i.e., layer 2) and Z  $\sim$  -12 Å is the last layer in region 1 (i.e., layer 6).

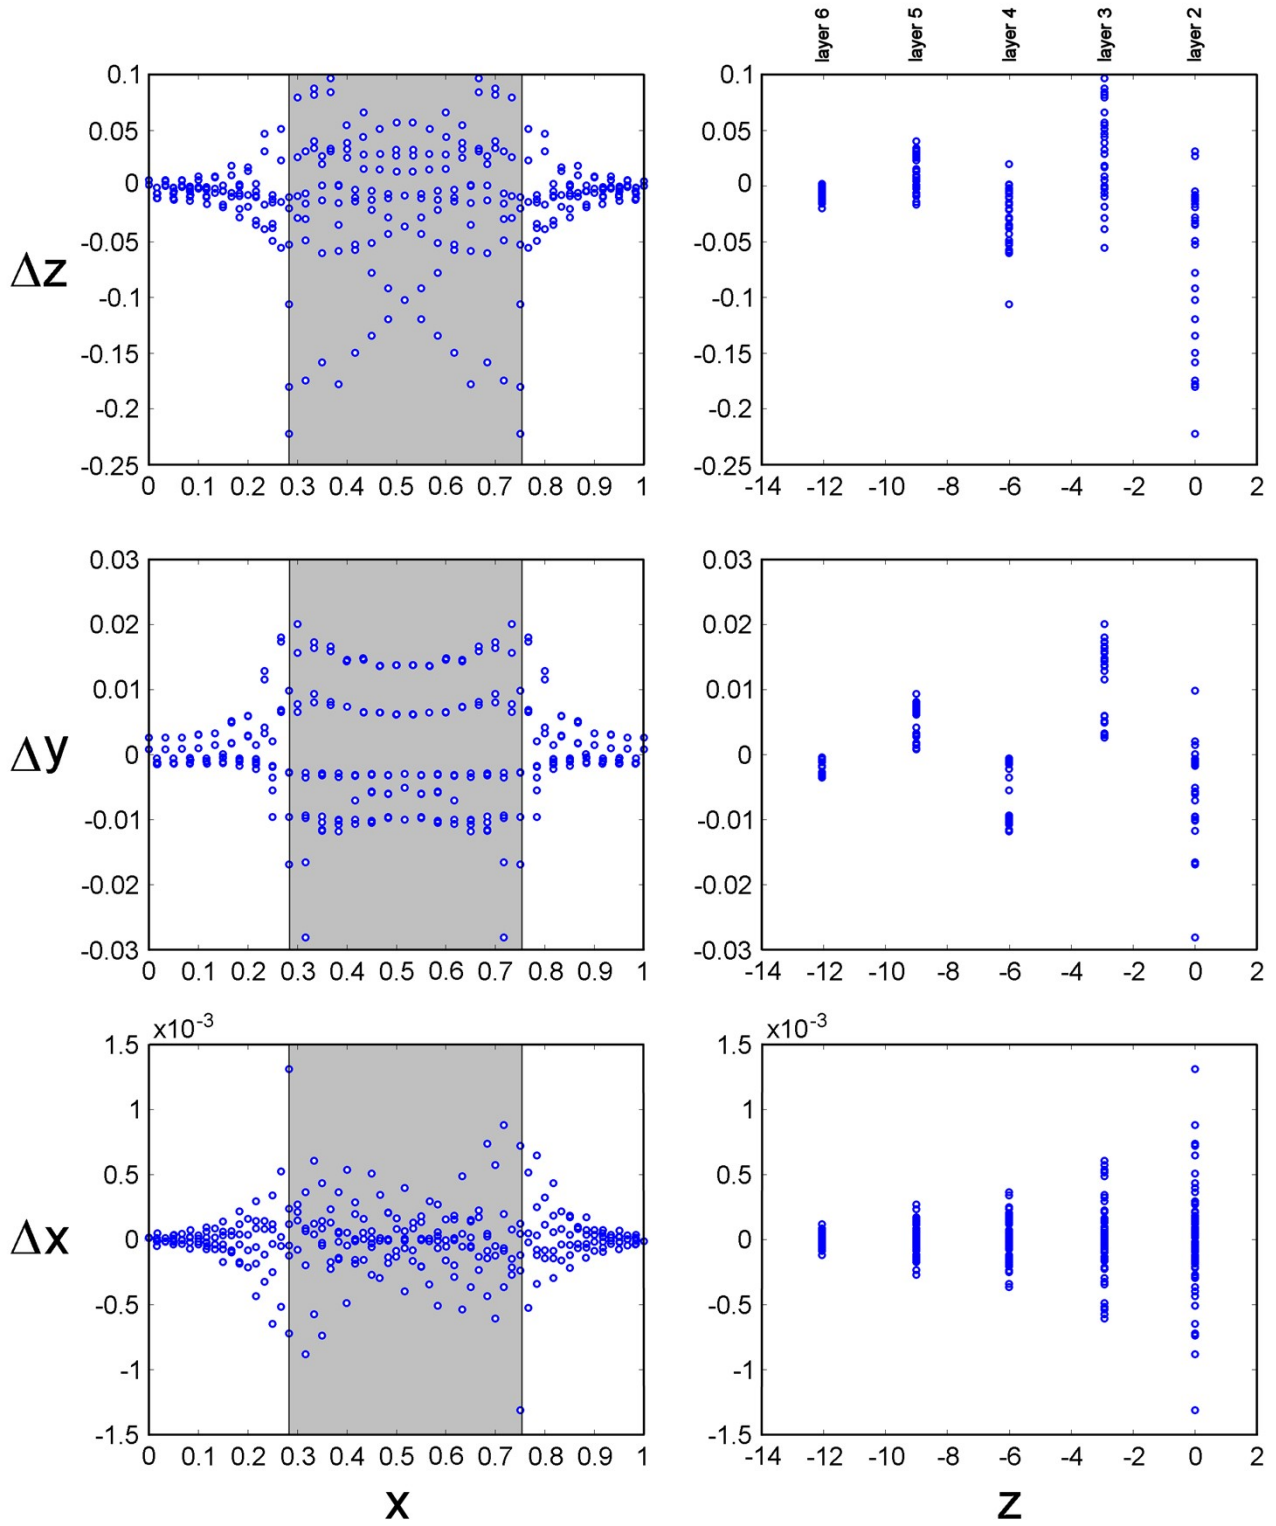

**Figure S4.**  $\Delta X$ ,  $\Delta Y$  and  $\Delta Z$  as a function of X (fractional coordinates) and Z (cartesian coordinates, Å) for the  $[4\bar{2}1]_{\text{CO}_3(\text{B})}$  step on (10.4) surface. In the left column, the grey area indicates the location of the step along X. In the right column, Z = 0 is the  $d_{10.4}$  layer just below the step (i.e., layer 2) and Z  $\sim$  -12 Å is the last layer in region 1 (i.e., layer 6).

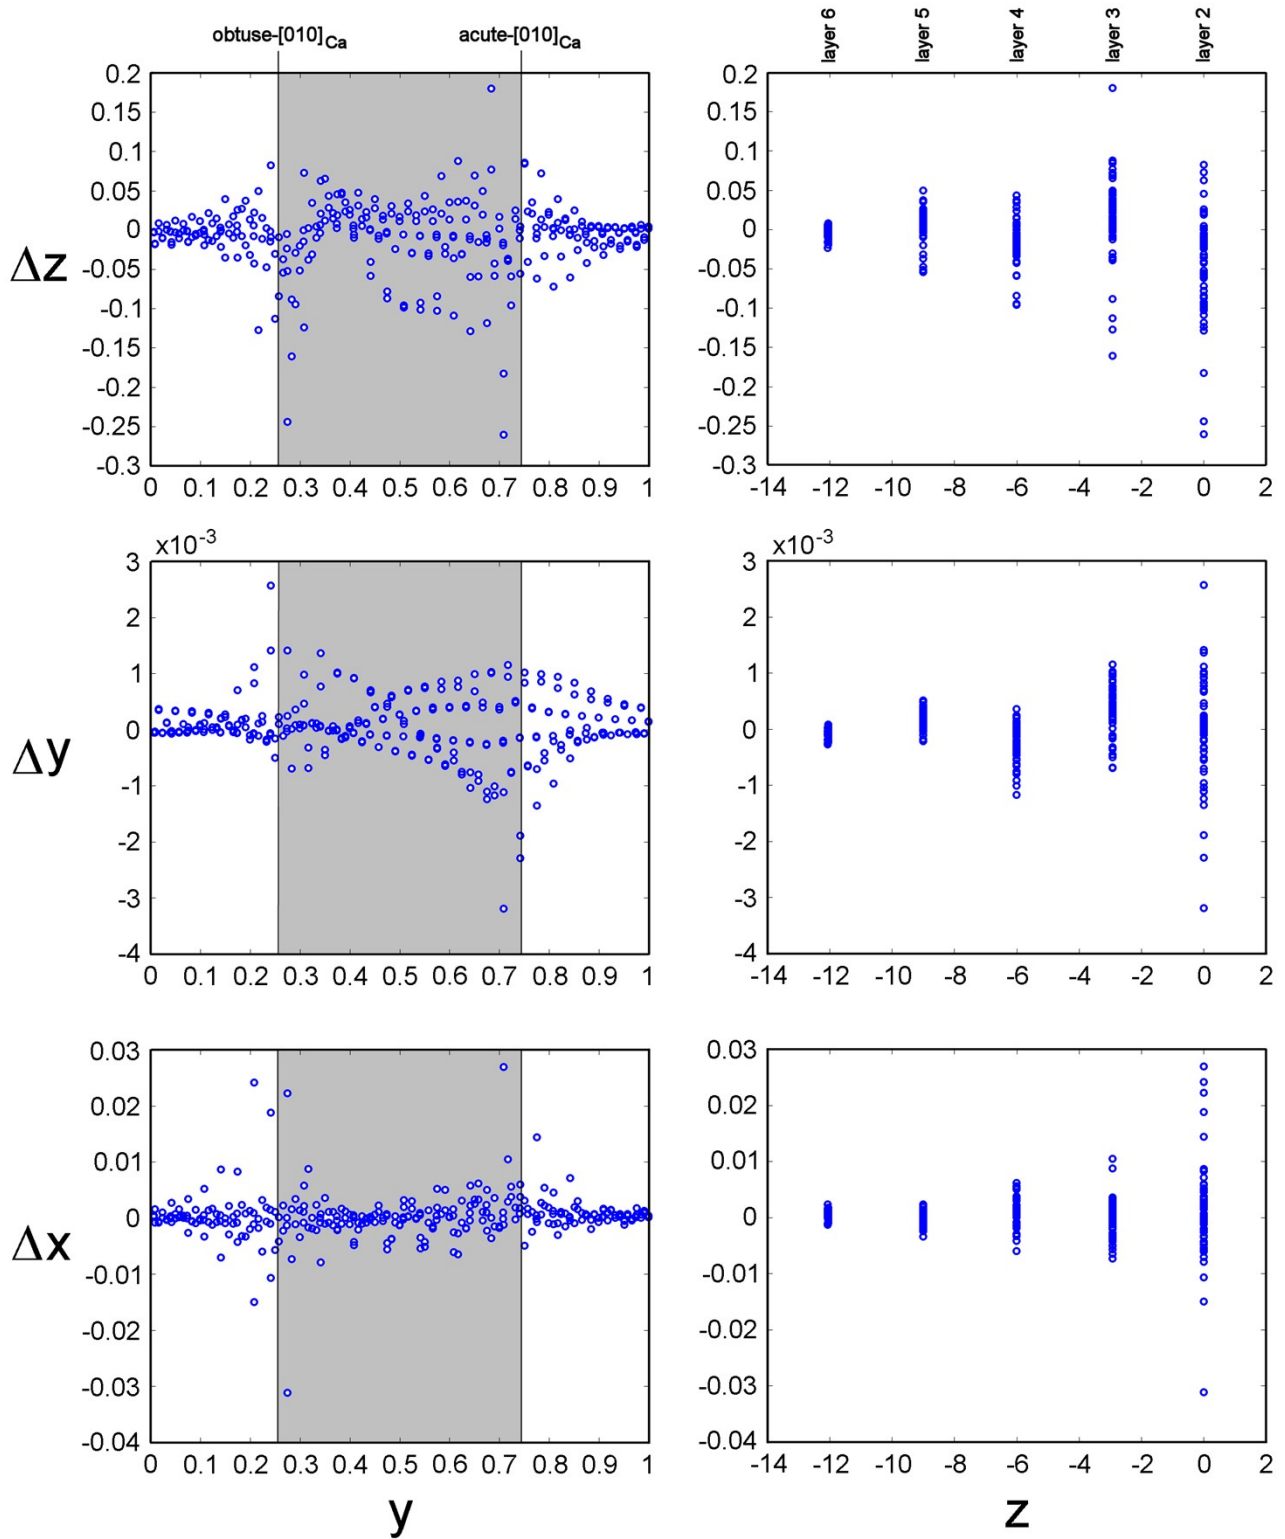

**Figure S5.**  $\Delta X$ ,  $\Delta Y$  and  $\Delta Z$  as a function of  $X$  (fractional coordinates) and  $Z$  (cartesian coordinates, Å) for the  $[010]_{\text{Ca}}$  step on (10.4) surface. In the left column, the grey area indicates the location of the step along  $Y$ . In the right column,  $Z = 0$  is the  $d_{10.4}$  layer just below the step (i.e., layer 2) and  $Z \sim -12$  Å is the last layer in region 1 (i.e., layer 6).

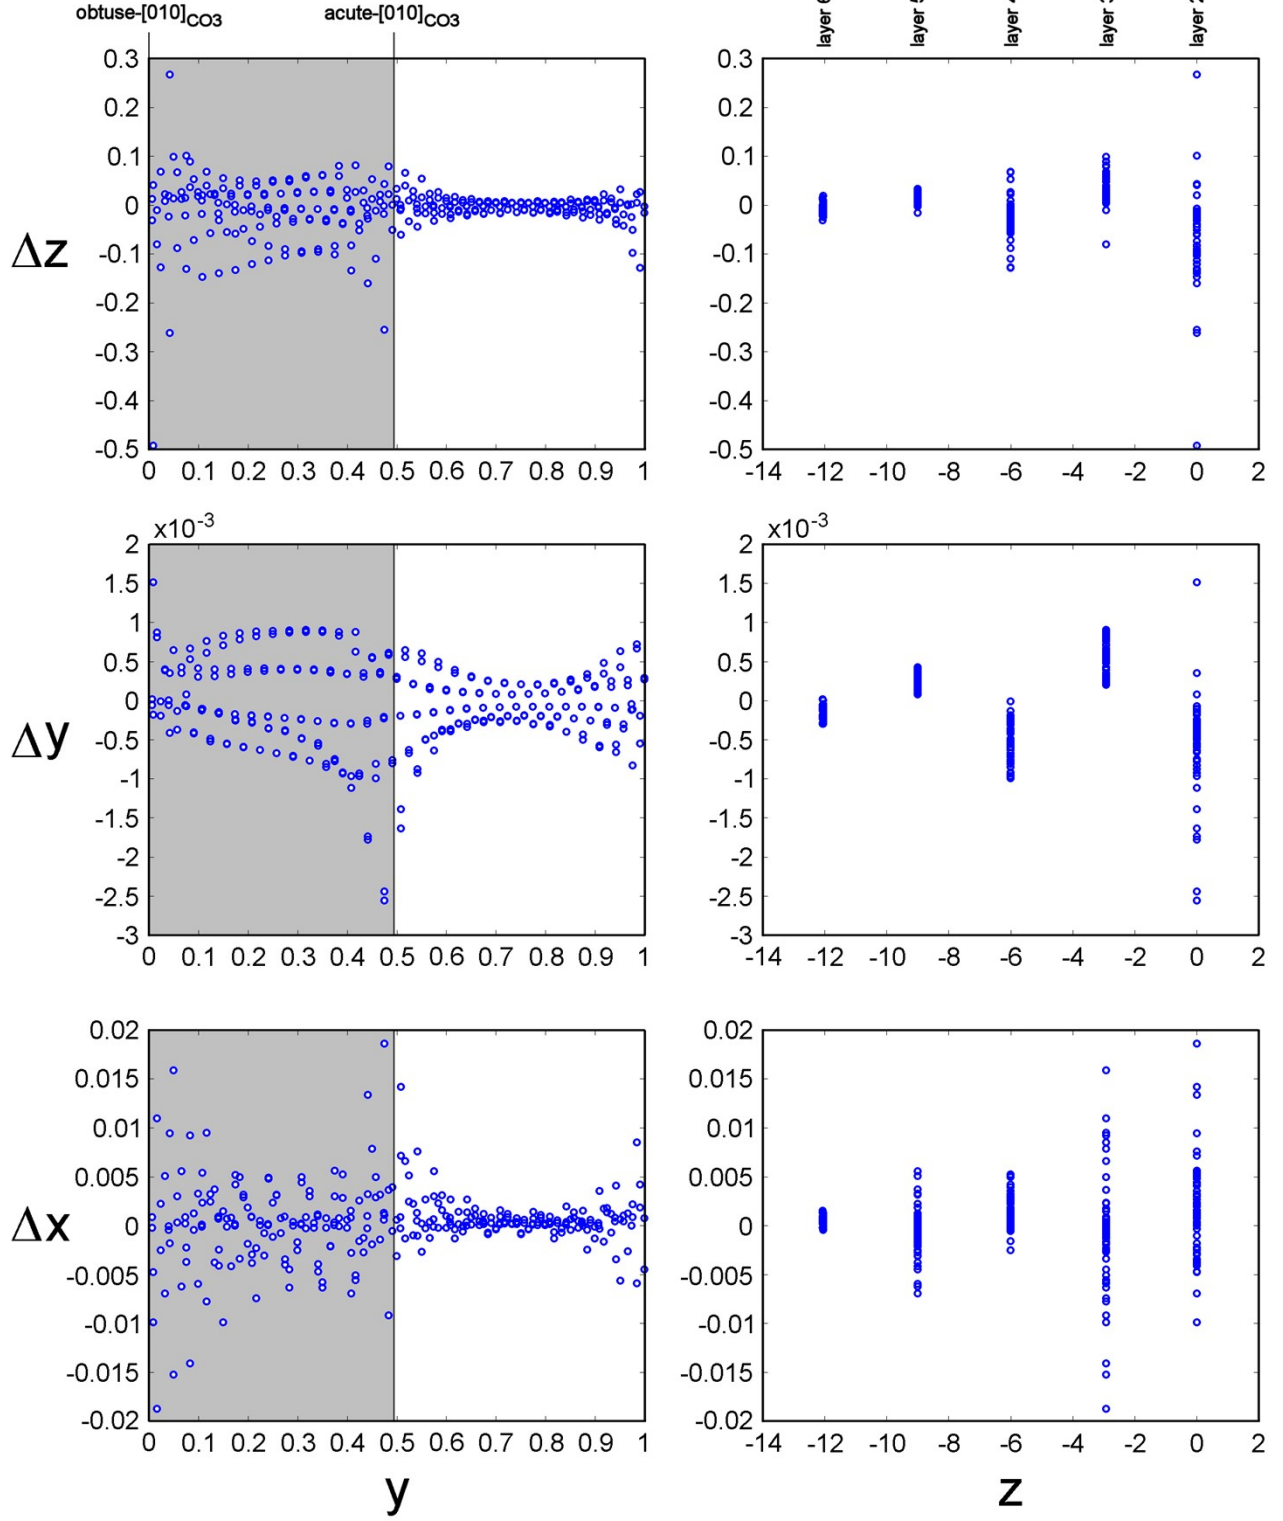

**Figure S6.**  $\Delta X$ ,  $\Delta Y$  and  $\Delta Z$  as a function of  $X$  (fractional coordinates) and  $Z$  (cartesian coordinates, Å) for the  $[010]_{\text{CO}_3}$  step on  $(10.4)$  surface. In the left column, the grey area indicates the location of the step along  $Y$ . In the right column,  $Z = 0$  is the  $d_{10.4}$  layer just below the step (i.e., layer 2) and  $Z \sim -12$  Å is the last layer in region 1 (i.e., layer 6).
